# Supplementary material
Source: PubMed Central journal article supplement (PMC4304989)

Supplemental Figure 1

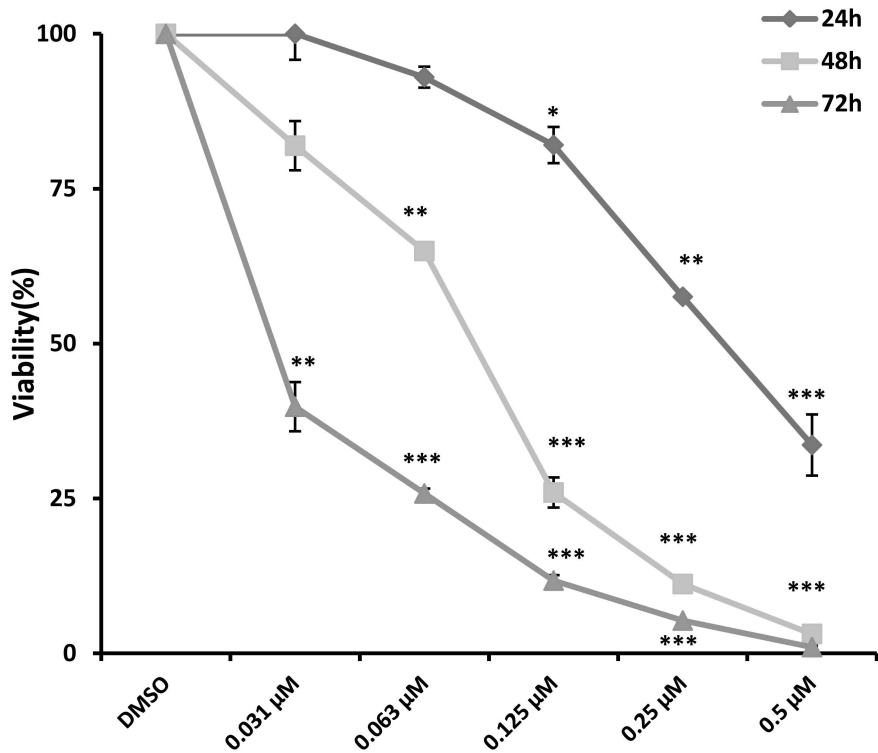

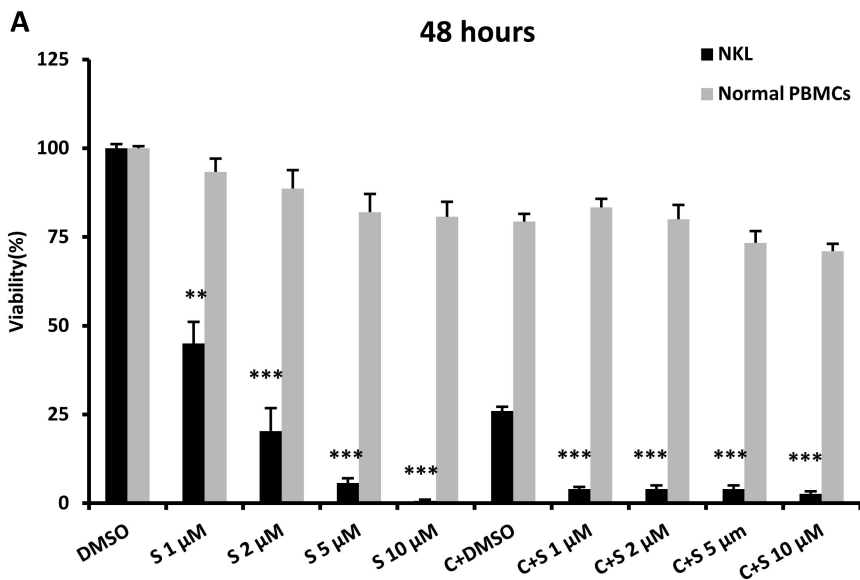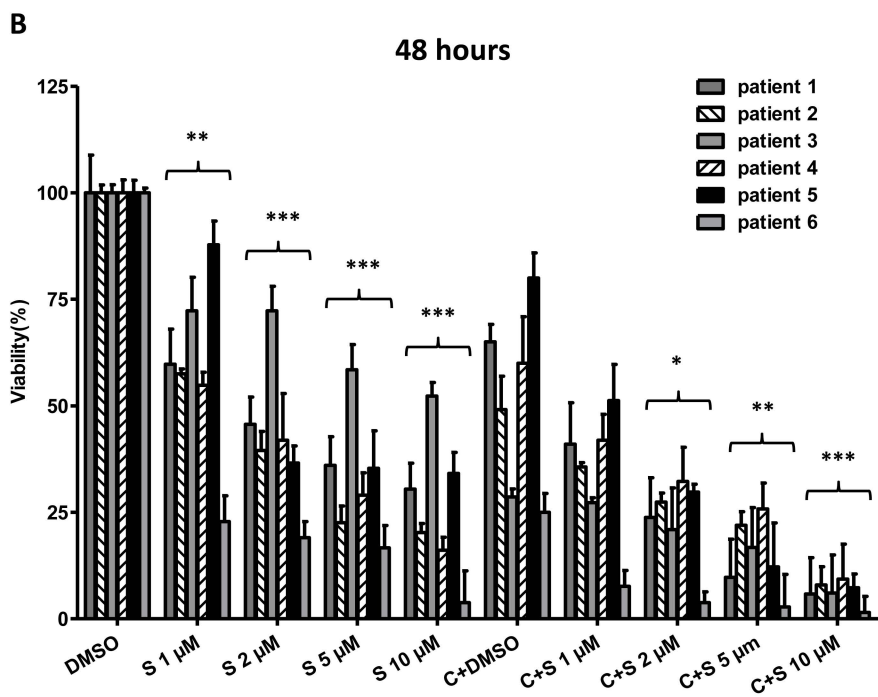

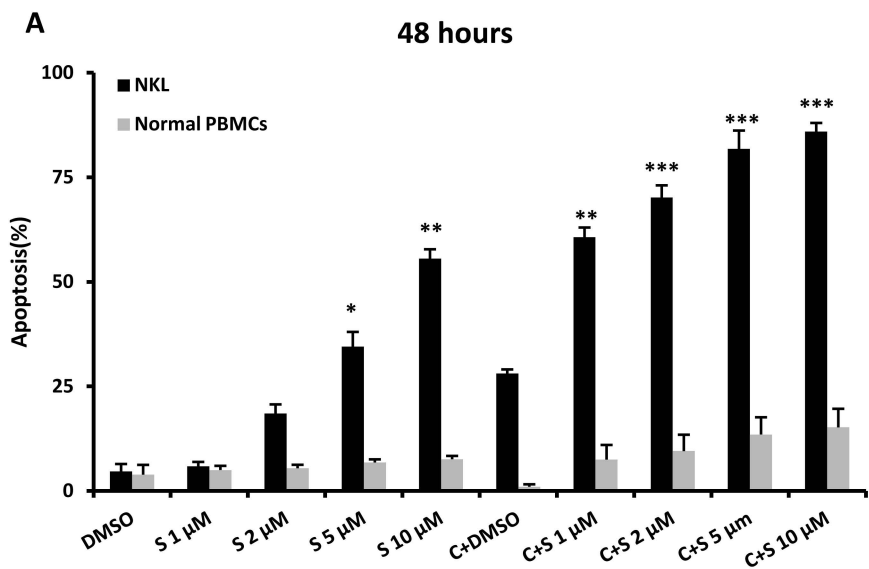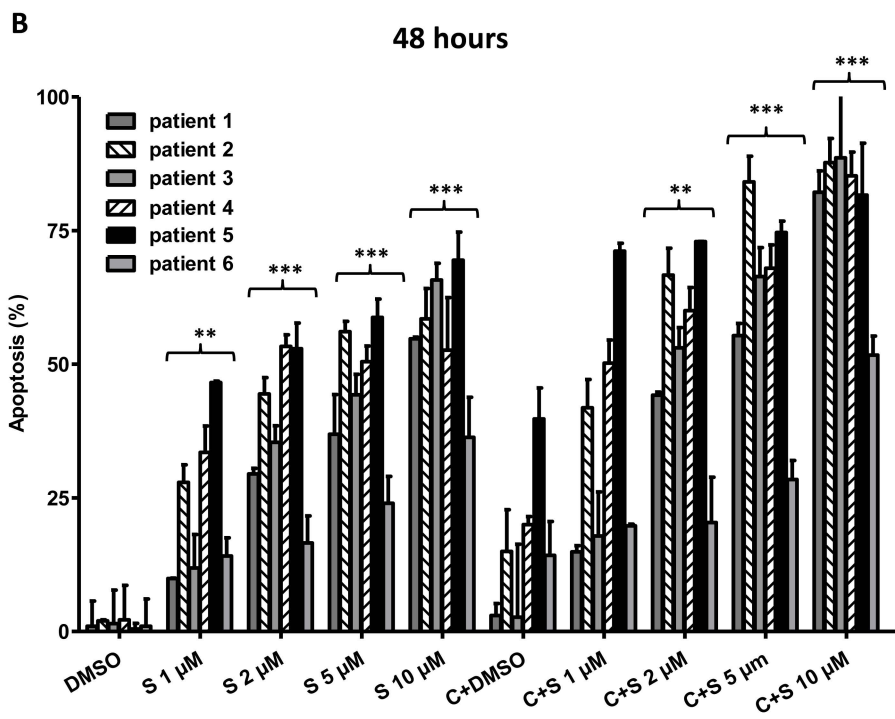

Supplemental Figure 4

A

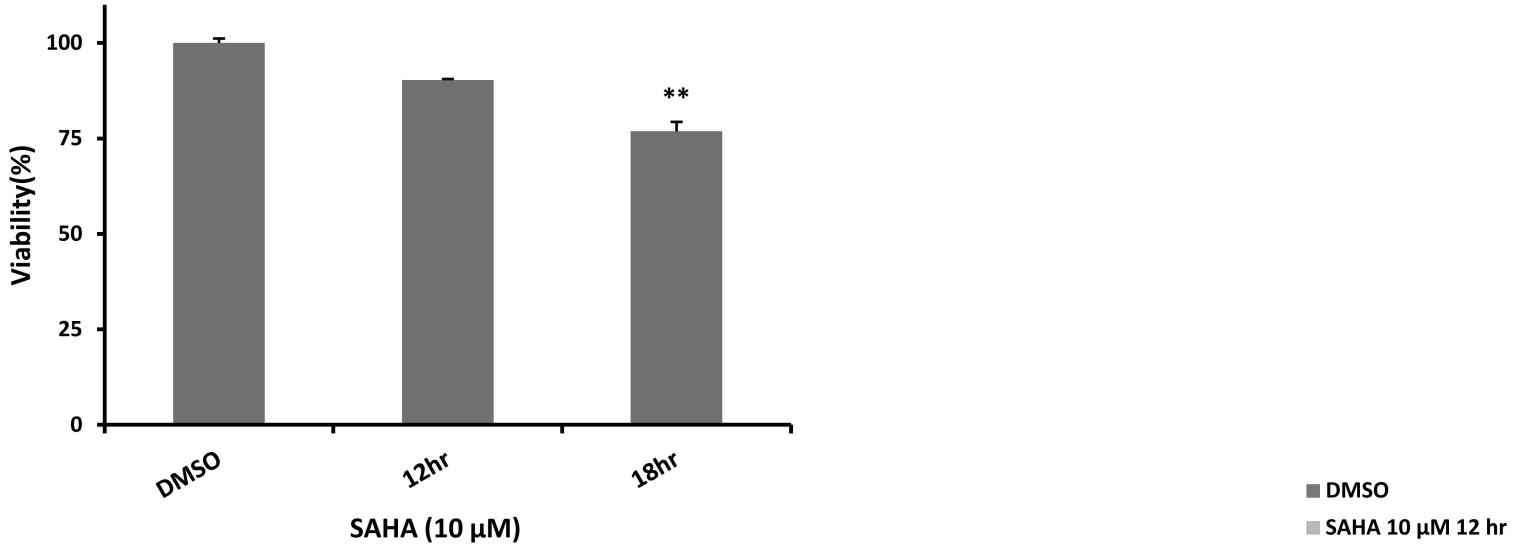

B

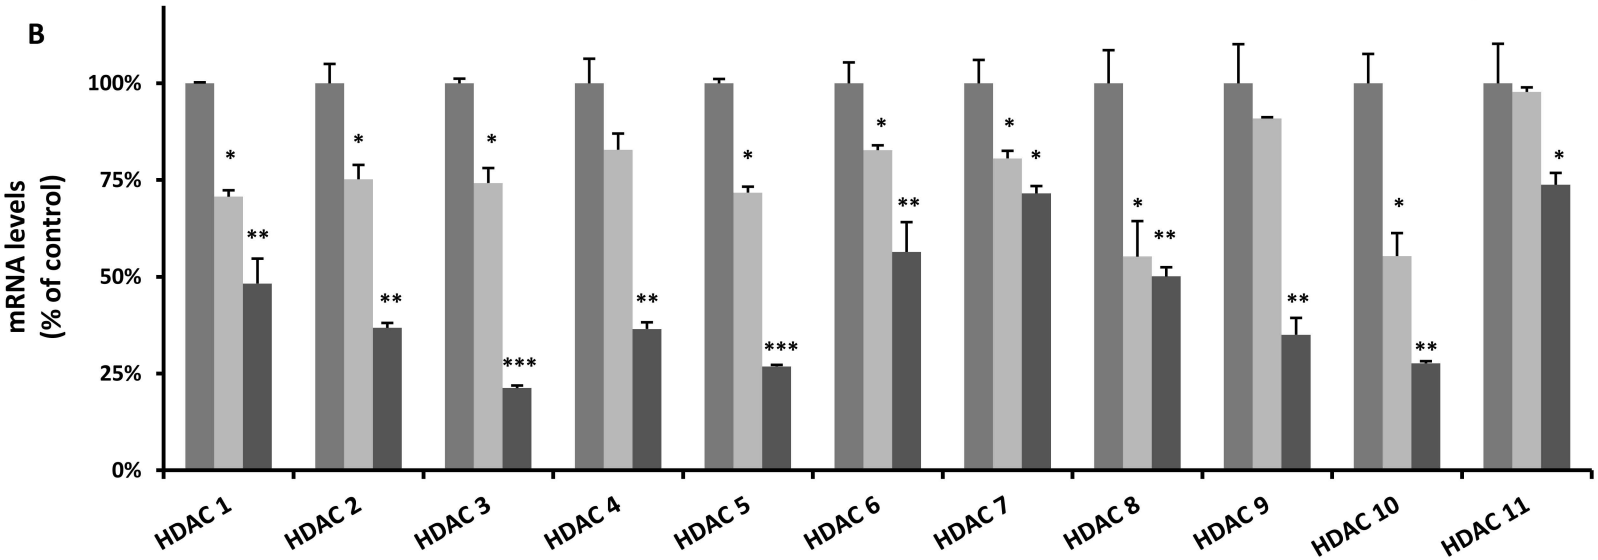

Supplement: NIHMS628789-supplement-Supp_FigureS1-S4.pdf [file NIHMS628789-supplement-Supp_FigureS1-S4.pdf]
